# Supplementary material
Source: PubMed Central journal article supplement (PMC11017891)
Supplement: media-11.pdf [file media-11.pdf]

## Supporting Information

### Probing enzyme-dependent pseudouridylation using direct RNA sequencing to assess neuronal transcriptome plasticity

Oleksandra Fanari<sup>1,3</sup>, Sepideh Tavakoli<sup>1,3</sup>, Keqing Nian<sup>1</sup>, Stuart Akeson<sup>1</sup>, Yuchen Qiu<sup>1</sup>, Amr Makhamreh<sup>1</sup>, Caroline A. McCormick<sup>1</sup>, Dylan Bloch<sup>1</sup>, Miten Jain<sup>1,2</sup>, Meni Wanunu<sup>1,2</sup>, and Sara H. Rouhanifard<sup>1,4</sup>

<sup>1</sup>Dept. of Bioengineering, Northeastern University, Boston, MA

<sup>2</sup>Dept. of Physics, Northeastern University, Boston, MA

<sup>3</sup>These authors contributed equally

<sup>4</sup>Lead contact

Correspondence: [s.rouhanifard@northeastern.edu](mailto:s.rouhanifard@northeastern.edu)

### Table of Contents

|                                                                                          |   |
|------------------------------------------------------------------------------------------|---|
| <b>Supplementary Figure 1</b> .....                                                      | 2 |
| <i>siRNA knockdown of TRUB1 and PUS7</i>                                                 |   |
| <b>Supplementary Figure 2</b> .....                                                      | 3 |
| <i>Sequence similarity of pseudouridine synthases</i>                                    |   |
| <b>Supplementary Figure 3</b> .....                                                      | 4 |
| <i>Differential expression profiles of neuronal differentiation markers</i>              |   |
| <b>Supplementary Figure 4</b> .....                                                      | 5 |
| <i>Immunofluorescence analysis of TRUB1 and PUS7 following differentiation</i>           |   |
| <b>Supplementary Figure 5</b> .....                                                      | 6 |
| <i>Immunofluorescence analysis of TRUB1 and PUS7 following Pb<sup>2+</sup> treatment</i> |   |

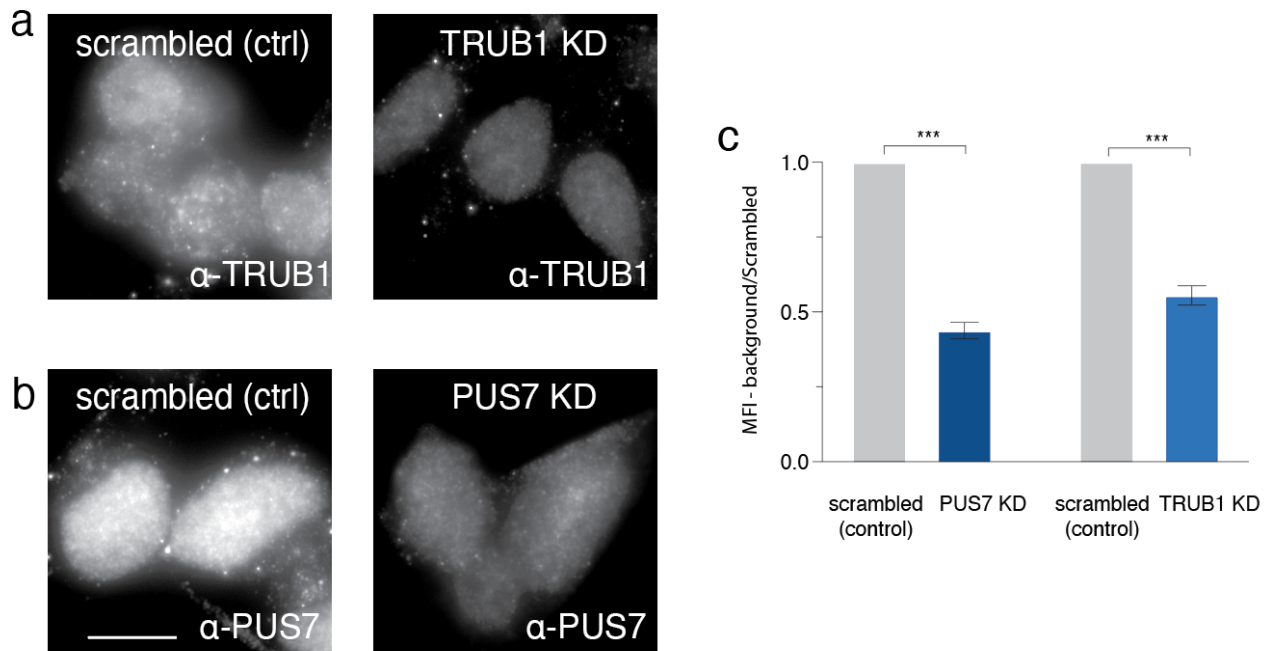

**Supplementary Figure 1.** a. Representative photomicrographs of a. TRUB1 knockdown (KD) and b. PUS7 KD vs Scrambled (control) cells show a substantial decrease in fluorescence in the KD library. c. Immunofluorescence (IF) of TRUB1 KD, PUS7 knockdown KD, and siRNA control show a decreased mean fluorescence intensity (MFI) in the KD cells compared to the control.

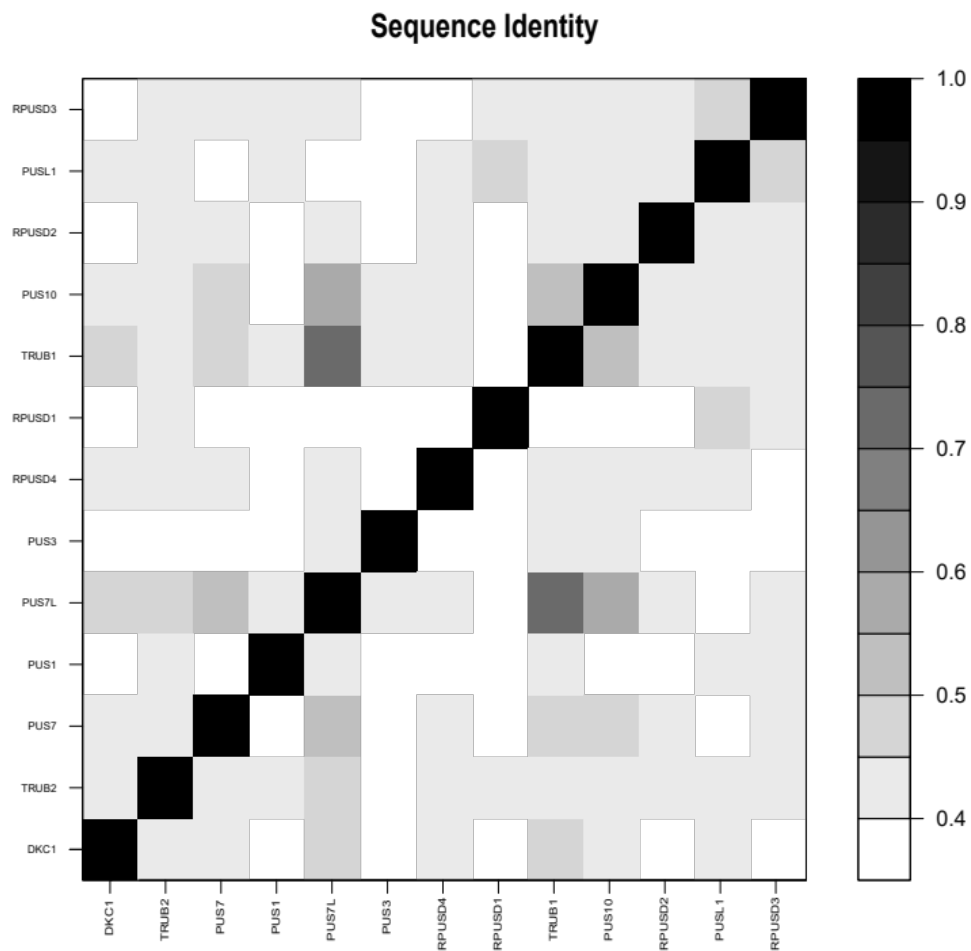

**Supplementary Figure 2.** Sequence identity matrix showing the sequence identity between each PUS enzyme nucleotide sequence in the multiple sequence alignment data (MSA).

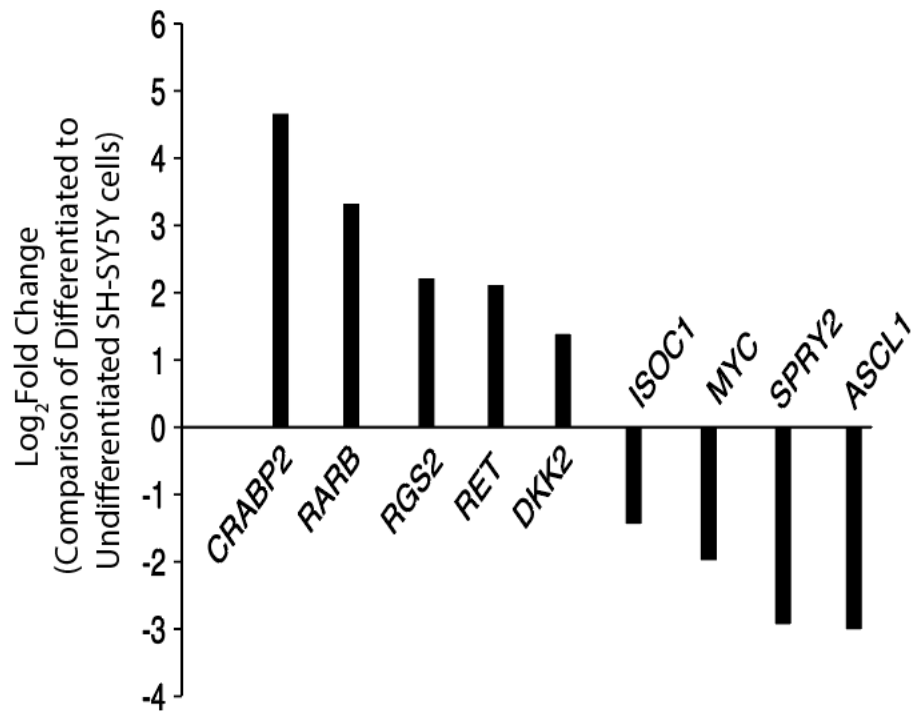

**Supplementary Figure 3.** Differential mRNA expression of known differentiation markers supports a change in the SH-SY5Y cellular state after the retinoic acid-induced differentiation treatment.

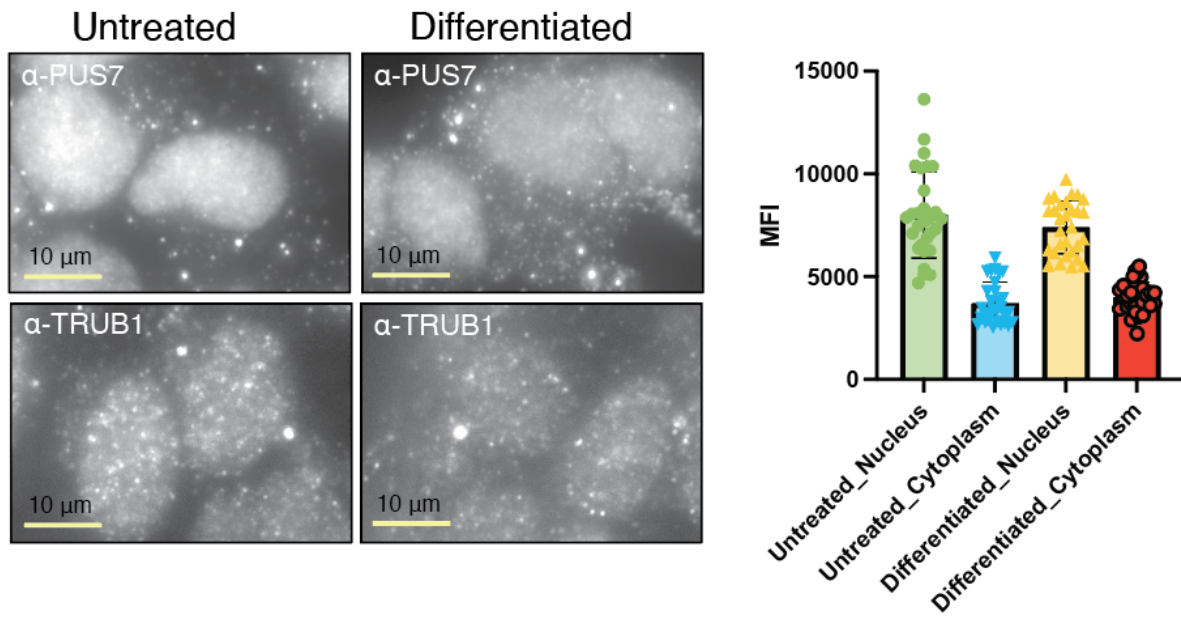

**Supplementary Figure 4.** IF images of untreated and differentiated SH-SY5Y cells using a. PUS7 and b. TRUB1 antibodies. (right) Comparison of PUS7 and TRUB1 antibodies' fluorescence intensity in the nucleus and cytoplasm of untreated and differentiated SH-SY5Y cells.

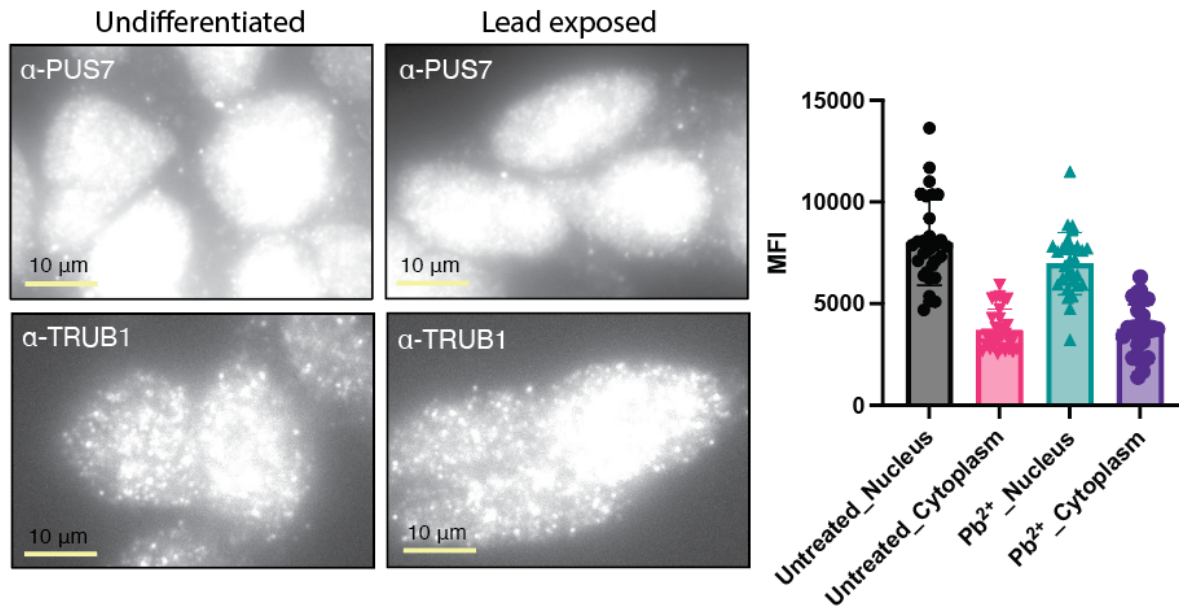

**Supplementary Figure 5.** IF images of untreated and Lead exposed SH-SY5Y cells using PUS7 and TRUB1 antibodies. (right) Comparison of PUS7 and TRUB1 antibodies' fluorescence intensity in the nucleus and cytoplasm of untreated and lead treated SH-SY5Y cells.
